# Supplementary material for: Exposure to maternal obesity programs sex differences in pancreatic islets of the offspring in mice
Source: Springer Nature journal article supplement (doi:10.1007/s00125-019-05037-y), 2019-11-26
Supplement: MOESM1 [file 17434554]

**ESM Table 1: Oligonucleotide primer sequences for qRT-PCR analysis**

| <b>Gene Name<br/>(GenBank<br/>accession no.)</b> | <b>Forward</b>                | <b>Reverse</b>                |
|--------------------------------------------------|-------------------------------|-------------------------------|
| <i>Actb</i><br>(NM_007393.5)                     | 5' GCCCTGAGGCTCTTTTCCAG3'     | 5' TGCCACAGGATTCCATACCC3'     |
| <i>Hprt</i><br>(NM_013556.2)                     | 5' GAGAGCGTTGGGCTTACCTC3'     | 5' ATCGCTAATCACGACGCTGG3'     |
| <i>Rplp0</i><br>(NM_007475.5)                    | 5'GAAAAGTTCTTGATCCCCAATGC3'   | 5' TGTGACTGGTCCACAATTCCTT3'   |
| <i>mt-Nd5</i><br>(NC_005089.1)                   | 5'ACGAAAATGACCCAGACCTC3'      | 5' AGATGACAAATCCTGCAAAGATG3'  |
| <i>mt-Cytb</i><br>(NC_005089.1)                  | 5'CCCACCCCATATTAACCCG3'       | 5'GAGGTATGAAGGAAAGGTATAAGGG3' |
| <i>mt-Co1</i><br>(NC_005089.1)                   | 5'TCCCAGATATAGCATTCCCACG3'    | 5'ACTGTTTCATCCTGTTCCCTGC3'    |
| <i>mt-Atp8</i><br>(NC_005089.1)                  | 5'GCCACAAC TAGATACATCAACATG3' | 5'TGGTTGTTAGTGATTTTGGTGAAG3'  |
| <i>Sdha</i><br>(NM_023281.1)                     | 5'TTACAAAGTGCGGGTCGATGA3'     | 5'TGTTCCCCAAACGGCTTCTT3'      |
| <i>Cat</i><br>(NM_009804.2)                      | 5'AGCGACCAGATGAAGCAGTG3'      | 5'TCCGCTCTCTGTCAAAGTGTG3'     |

| <b>Gene Name<br/>(GenBank accession<br/>no.)</b> | <b>Forward</b>              | <b>Reverse</b>            |
|--------------------------------------------------|-----------------------------|---------------------------|
| <i>Sod2</i><br>(NM_013671.3)                     | 5'CAGACCTGCCTTACGACTATGG3'  | 5'CTCGGTGGCGTTGAGATTGTT3' |
| <i>Casp3</i><br>(NM_001284409.1)                 | 5'TGGTGATGAAGGGGTCATTTATG3' | 5'TTCGGCTTTCCAGTCAGACTC3' |
| <i>Casp9</i><br>(NM_001277932.1)                 | 5'TCCTGGTACATCGAGACCTTG3'   | 5'AAGTCCCTTTCGCAGAAACAG3' |

**ESM Table 2: Antibodies used for Western blotting**

| <b>Protein</b>    | <b>Characteristic</b>                                                                  | <b>Company and location</b>                     | <b>Catalogue No.</b> | <b>Dilution</b>                 |
|-------------------|----------------------------------------------------------------------------------------|-------------------------------------------------|----------------------|---------------------------------|
| Alexa Fluor® 488  | Donkey anti-guinea pig                                                                 | Jackson ImmunoResearch, Ely, Cambridgeshire, UK | 705-545-148          | 1:100                           |
| ATP5A             | Mouse monoclonal to Complex V subunit ATP5A (Total OXPHOS Rodent WB Antibody Cocktail) | Abcam, Cambridge, Cambridgeshire, UK            | ab110413             | 1:1000                          |
| BAX               | Rabbit polyclonal to Bax                                                               | Cell Signalling Technology, Danvers, MA, USA    | #2772                | 1:1000                          |
| BCL-2             | Rabbit monoclonal to BCL-2                                                             | Cell Signalling Technology                      | #3498                | 1:500                           |
| Cleaved caspase-3 | Rabbit polyclonal to the large fragment of caspase-3 resulting from cleavage           | Cell Signalling Technology                      | #9662                | 1:500                           |
| Cyanine Cy™5      | Donkey anti-rabbit                                                                     | Jackson ImmunoResearch                          | 711-175-152          | 1:250                           |
| DAPI              |                                                                                        | Thermo Fisher Scientific, Carlsbad, CA, USA     | D1306                | 1:2500 (5 mg/ml stock solution) |
| ER $\alpha$       | Mouse monoclonal to ER $\alpha$                                                        | Santa Cruz Biotechnology, Dallas, TX, USA       | sc-8002              | 1:500                           |
| GCG               | Rabbit polyclonal to GCG                                                               | Bioss Antibodies, Woburn, MA, USA               | bs-3796R             | 1:100                           |

| <b>Protein</b> | <b>Characteristic</b>                                                                    | <b>Company and location</b>              | <b>Catalogue No.</b> | <b>Dilution</b> |
|----------------|------------------------------------------------------------------------------------------|------------------------------------------|----------------------|-----------------|
| GK             | Rabbit polyclonal to GK                                                                  | Santa Cruz Biotechnology                 | sc-7908              | 1:500           |
| GLUT2          | Rabbit polyclonal to Glucose Transporter GLUT2                                           | Abcam                                    | ab54460              | 1:1000          |
| INS            | Guinea-pig polyclonal to INS                                                             | Dako, Technologies, Santa Clara, CA, USA | A0564                | 1:50            |
| MT-CO1         | Mouse monoclonal to Complex IV subunit MT-CO1 (Total OXPHOS Rodent WB Antibody Cocktail) | Abcam                                    | ab110413             | 1:1000          |
| NDUFB8         | Mouse monoclonal to Complex I subunit NDUFB8 (Total OXPHOS Rodent WB Antibody Cocktail)  | Abcam                                    | ab110413             | 1:1000          |
| SDHB           | Mouse monoclonal to Complex II subunit SDHB (Total OXPHOS Rodent WB Antibody Cocktail)   | Abcam                                    | ab110413             | 1:1000          |
| STX1A          | Mouse monoclonal to STX1A                                                                | Synaptic Systems, Germany                | 110 111              | 1:1000          |
| STXBP1         | Rabbit polyclonal to STXBP1                                                              | Synaptic Systems                         | 116 002              | 1:1000          |
| TFAM           | Rabbit polyclonal to TFAM                                                                | Abcam                                    | ab47517              | 1:500           |

| <b>Protein</b>   | <b>Characteristic</b>                                                                     | <b>Company and location</b> | <b>Catalogue No.</b> | <b>Dilution</b> |
|------------------|-------------------------------------------------------------------------------------------|-----------------------------|----------------------|-----------------|
| UQCRC2           | Mouse monoclonal to Complex III subunit UQCRC2 (Total OXPHOS Rodent WB Antibody Cocktail) | Abcam                       | ab110413             | 1:1000          |
| $\beta$ -Tubulin | Rabbit polyclonal to $\beta$ -Tubulin                                                     | Abcam                       | ab15568              | 1:5000          |

**ESM Table 3: Body weight and serum glucose and insulin concentrations in male and female offspring of control and obese dams.**

|                                             | Control     |            | Obese       |            |
|---------------------------------------------|-------------|------------|-------------|------------|
|                                             | Males       | Females    | Males       | Females    |
| <b>Body weight (g)</b>                      | 25.3 ± 0.7* | 20.6 ± 0.4 | 25.3 ± 0.9* | 20.5 ± 0.5 |
| <b>Blood glucose concentration (mmol/l)</b> | 13.2 ± 1.2  | 11.5 ± 0.8 | 12.7 ± 1.1  | 10.9 ± 0.5 |
| <b>Serum insulin concentration (pmol/l)</b> | 245 ± 31**  | 124 ± 17   | 257 ± 29**  | 166 ± 34   |

Blood was collected from fed animals at eight weeks of age. Data were analysed by two-way ANOVA followed by Tukey's multiple comparisons test. \*P<0.05 and \*\*P<0.01 for an effect of offspring sex. Males, *n*=8 mice/group and females, *n*=7 mice/group. 'n' represents the number of mice from separate litters. All data are mean ± s.e.m.

**ESM Fig. 1: Images of Western blots used for quantification of protein abundance**

a.

**Glucose transporter 2 (Females)**

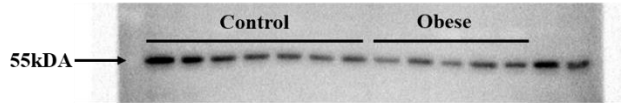

**β-tubulin (Females)**

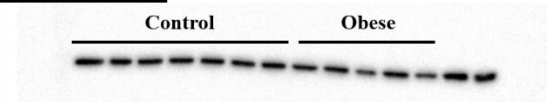

**Glucose transporter 2 (Males)**

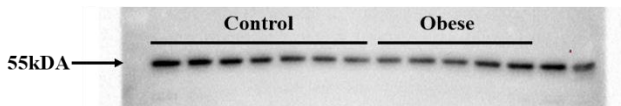

**β-tubulin (Males)**

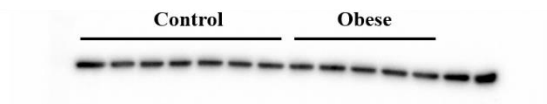

b.

**Glucokinase (Females)**

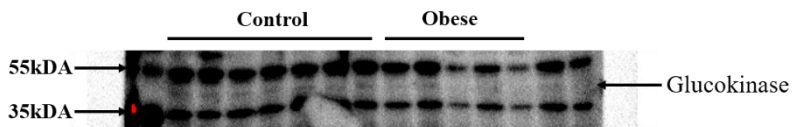

**β-tubulin (Females)**

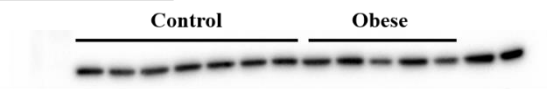

**Glucokinase (Males)**

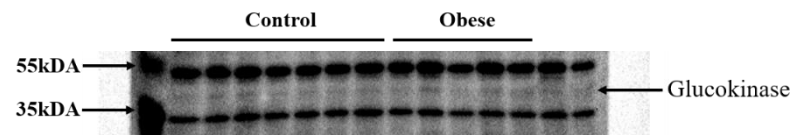

**β-tubulin (Males)**

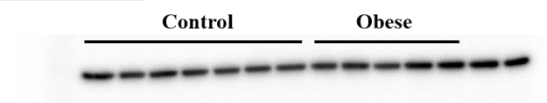

C.

**Mitochondrial transcription factor A (Mitochondrial) (Females)**

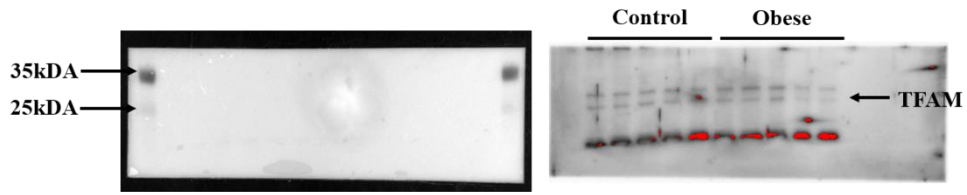

**$\beta$ -tubulin (Females)**

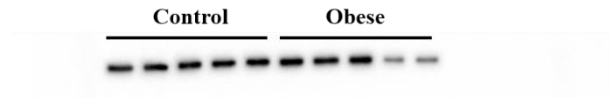

**Mitochondrial transcription factor A (Mitochondrial) (Males)**

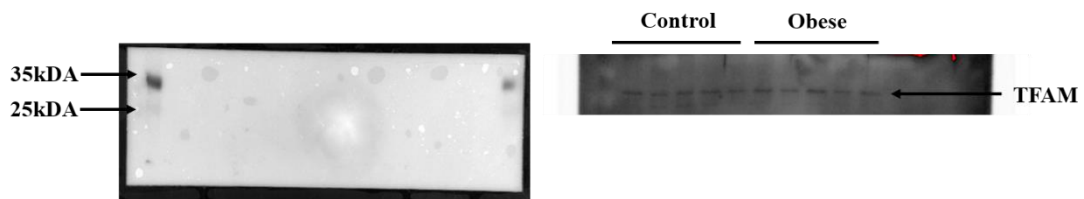

**$\beta$ -tubulin (Males)**

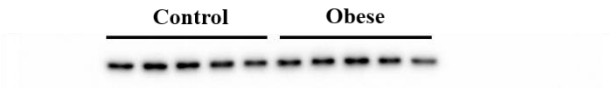



d.

**Total OXPHOS (Complex I) (Females)**

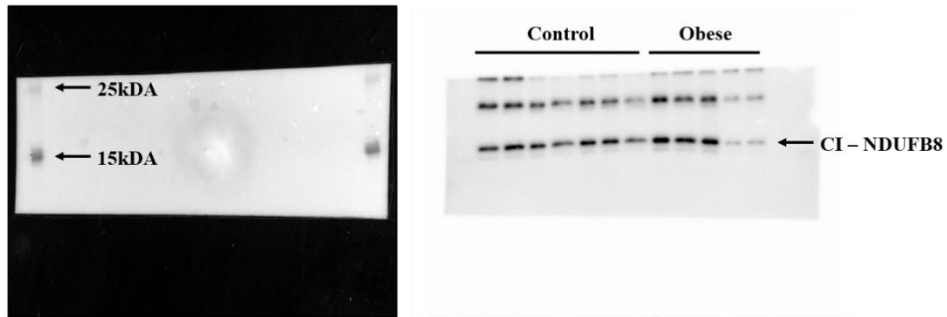

**$\beta$ -tubulin (Females)**

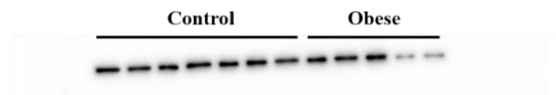

**Total OXPHOS (Complex II to V) (Females)**

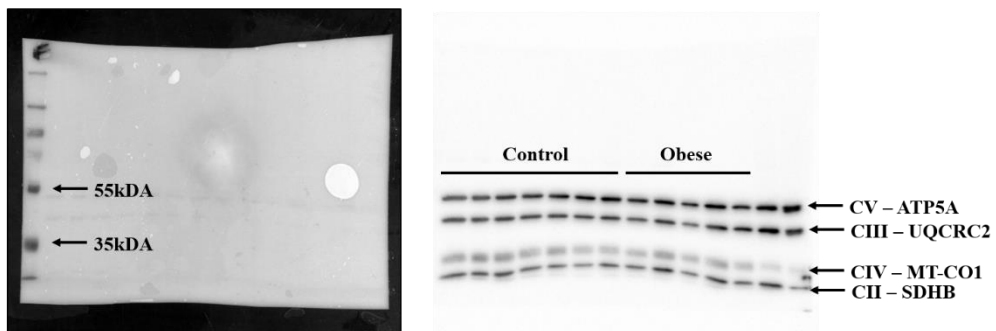

**$\beta$ -tubulin (Females)**

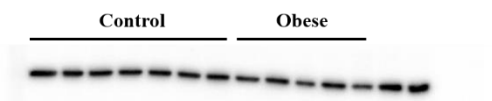

**Total OXPHOS (Complex I) (Males)**

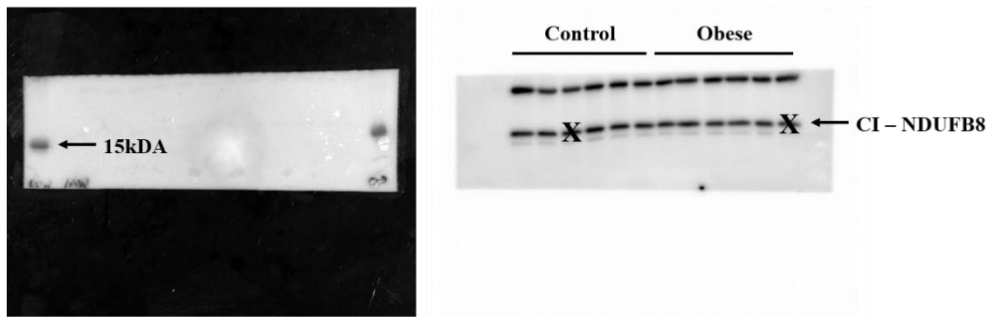

**$\beta$ -tubulin (Males)**

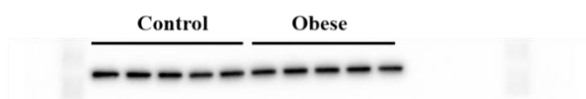

**Total OXPHOS (Complex II to V) (Males)**

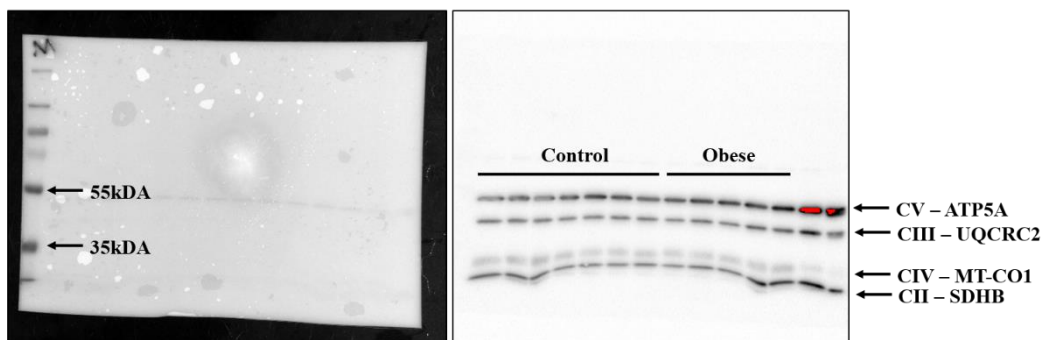

**$\beta$ -tubulin (Males)**

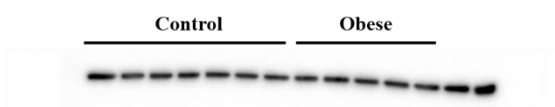

e.

**Syntaxin 1a (Females)**

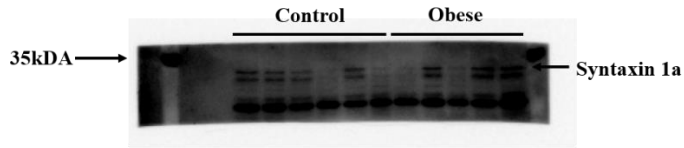

**$\beta$ -tubulin (Females)**

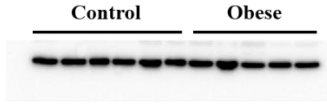

**Syntaxin 1a (Males)**

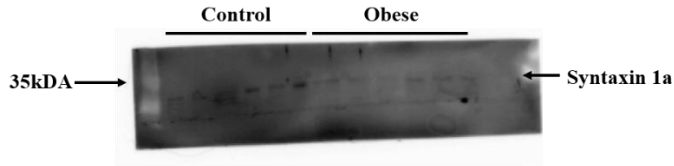

**$\beta$ -tubulin (Males)**

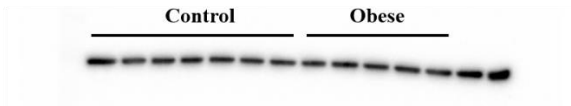

f.

**Syntaxin binding protein 1a**

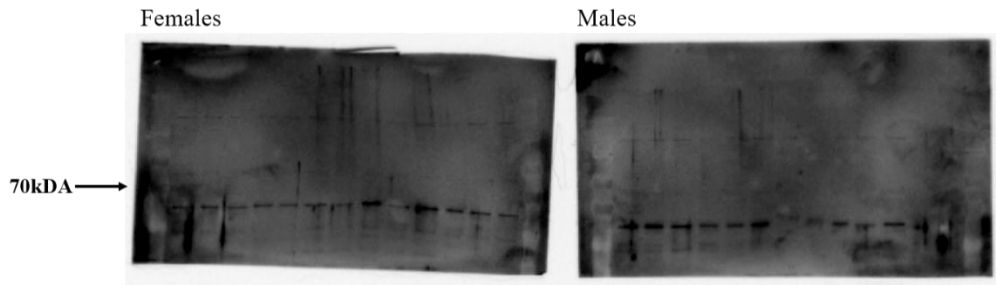

**$\beta$ -tubulin**

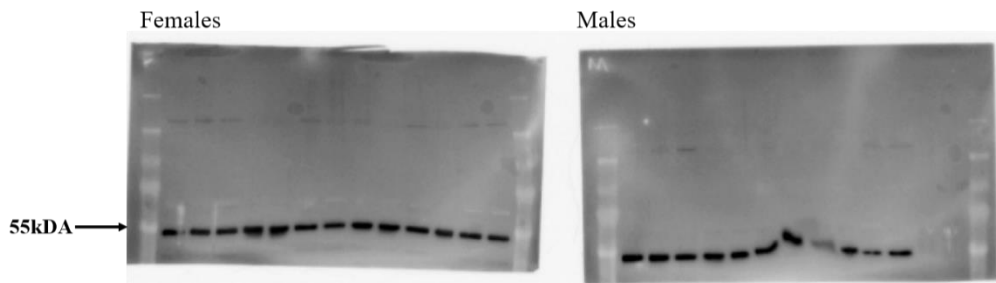

g.

**Estrogen receptor  $\alpha$  (Females)**

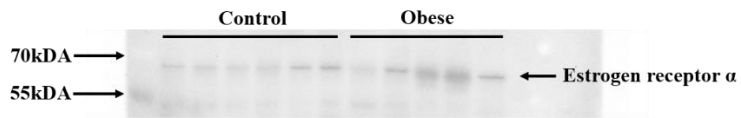

**$\beta$ -tubulin (Females)**

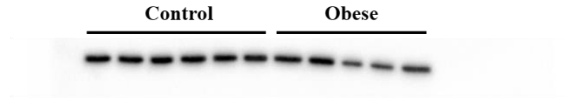

**Estrogen receptor  $\alpha$  (Males)**

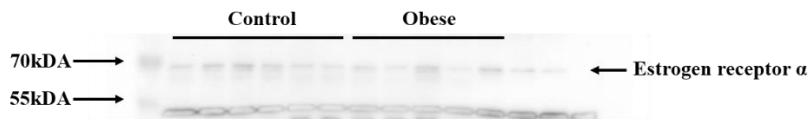

**$\beta$ -tubulin (Males)**

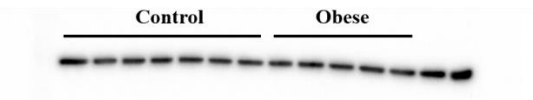

h.

**Cleaved caspase 3 (Females)**

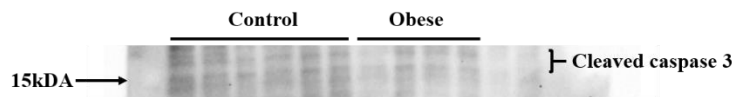

**$\beta$ -tubulin (Females)**

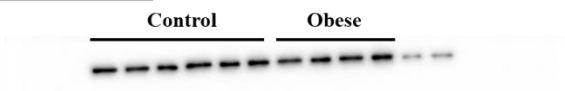

**Cleaved caspase 3 (Males)**

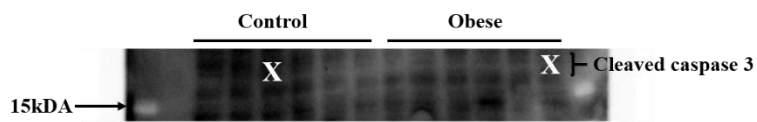

**$\beta$ -tubulin (Males)**

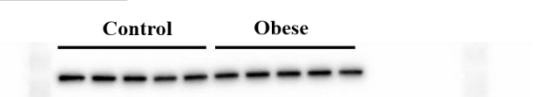

i.

**Bax (Females)**

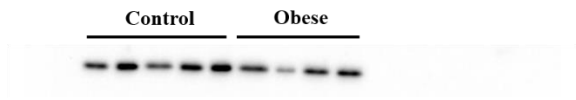

**β-tubulin (Females)**

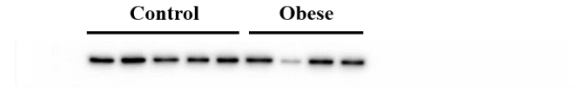

**Bax (Males)**

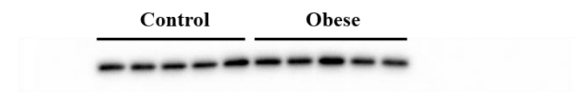

**β-tubulin (Males)**

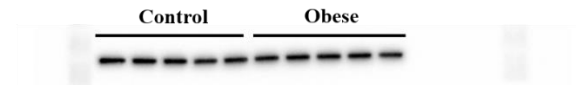

j.

**Bcl-2 (Females)**

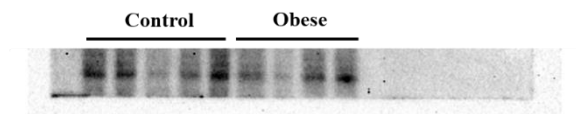

**β-tubulin (Females)**

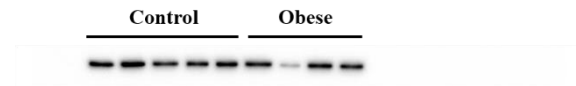

**Bcl-2 (Males)**

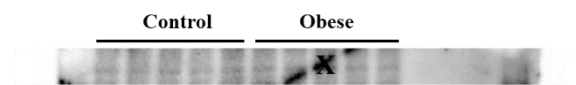

**β-tubulin (Males)**

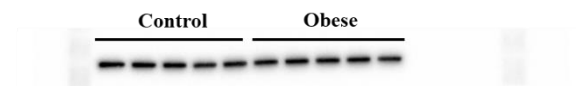

**ESM Fig. 2: Male offspring had higher absolute pancreas weight and total pancreatic tissue area whilst female offspring had greater number of glucagon<sup>+</sup> cells, irrespective of maternal diet.**

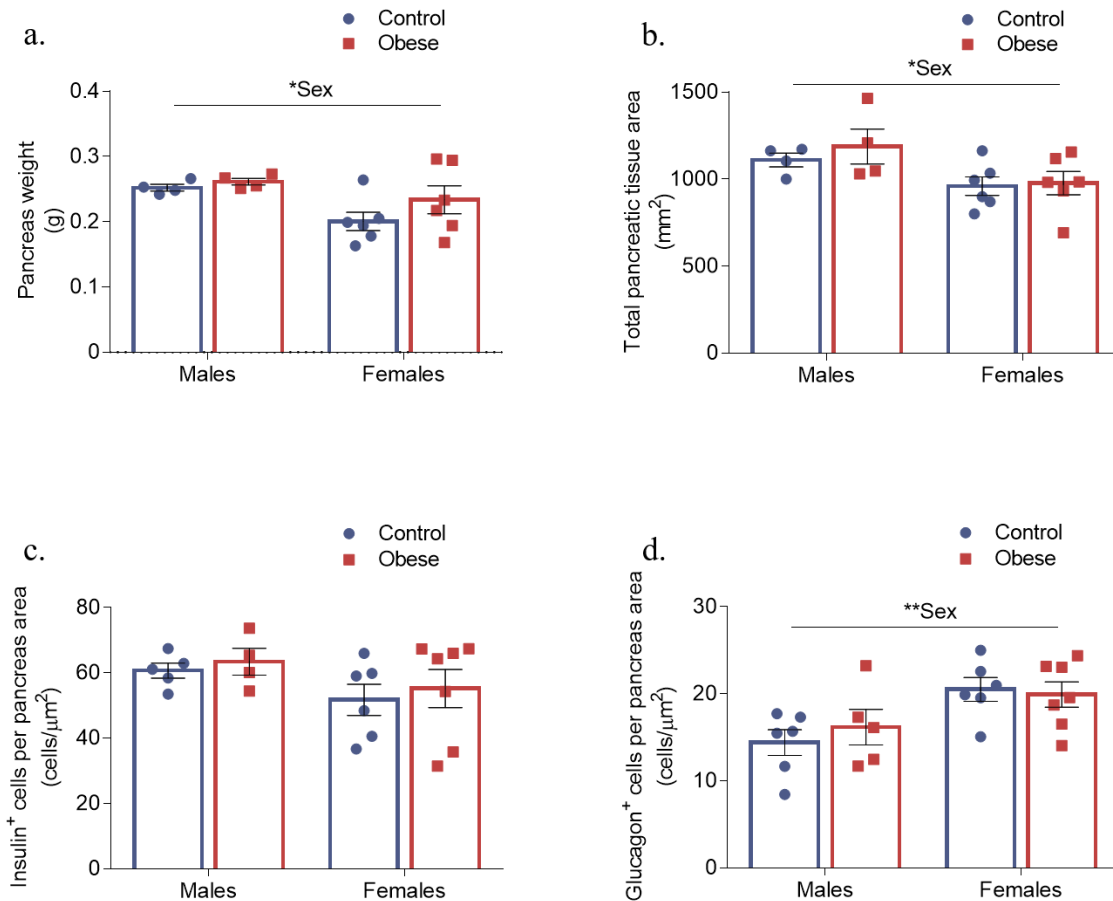

Absolute pancreas weight (**a**), total pancreatic tissue area (**b**), number of insulin<sup>+</sup> cells per pancreas area (**c**) and number of glucagon<sup>+</sup> cells per pancreas area in 8-week-old male and female offspring of control and obese dams. Data were analysed by two-way ANOVA. \* $p < 0.05$  and \*\* $p < 0.01$ . (**a, b**) males, control:  $n = 4$ , obese:  $n = 4$ ; females, control:  $n = 6$  obese:  $n = 6$  mice; (**c**) males, control:  $n = 4$ , obese:  $n = 4$ ; females, control:  $n = 6$  obese:  $n = 7$  mice; (**d**) males, control:  $n = 6$ , obese:  $n = 5$ ; females, control:  $n = 6$  obese:  $n = 7$  mice. ‘ $n$ ’ represents the number of mice from separate litters. All data are mean  $\pm$  s.e.m.

**ESM Fig. 3: Exposure of male offspring to maternal obesity had minimal impact on mitochondrial DNA content and expression of mitochondrial and nuclear-encoded components of the electron transport chain.**

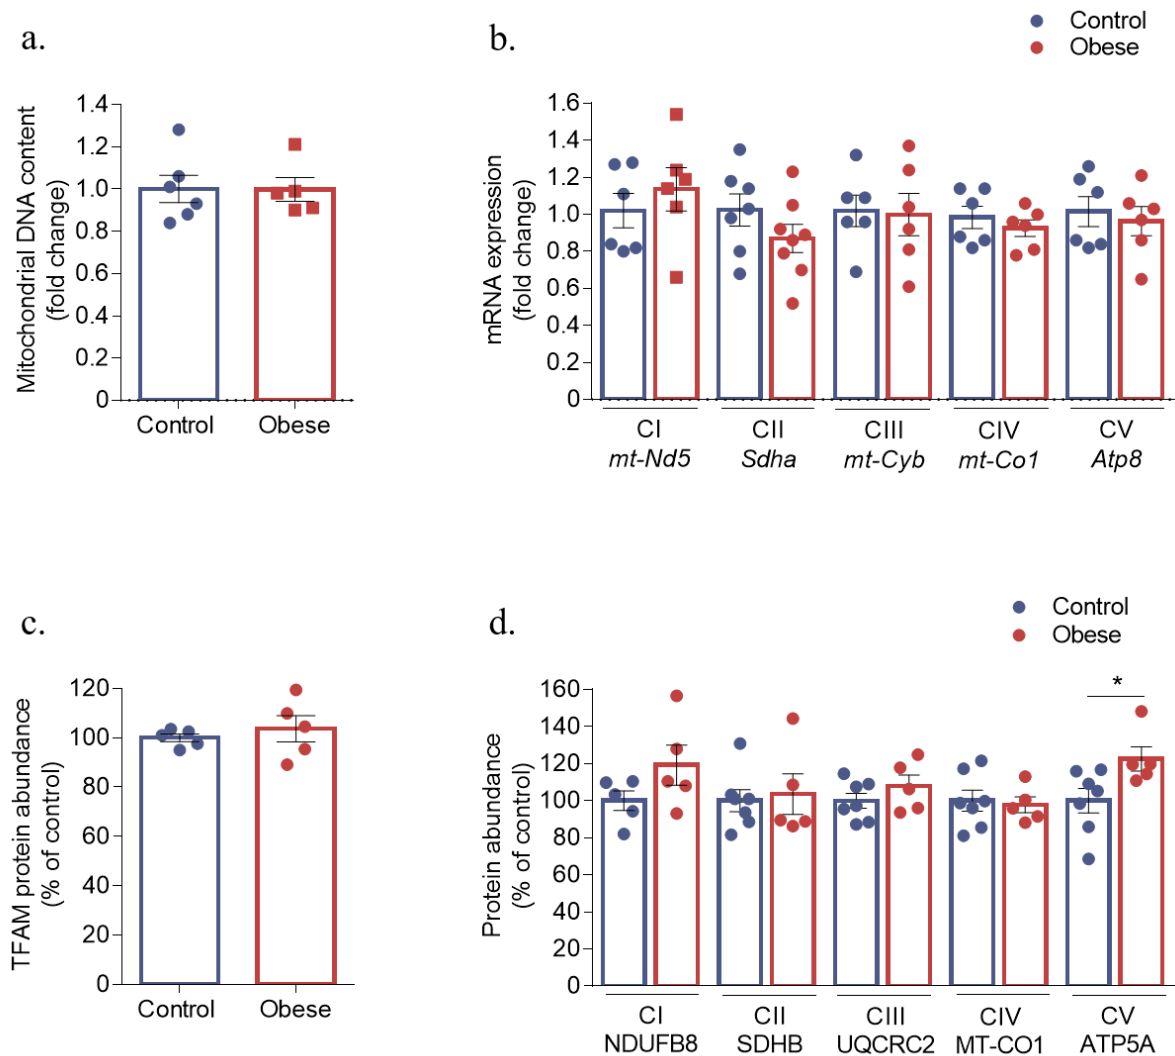

Mitochondrial DNA content **(a)**. qRT-PCR analysis of mRNA expression of mitochondrial (*mt-Nd5*, *mt-Cyb*, *mt-Co1*, *mt-Atp8*) and nuclear (*Sdha*) encoded components of the electron transport chain **(b)**. Western blot analysis of mitochondrial transcription factor A (TFAM) **(c)** and mitochondrial (MT-CO1) and nuclear (NFUFB8, SDHB, UQCRC2 and ATP5A) encoded components of the electron transport chain **(d)**. Image of corresponding Western blots: ESM Fig.1c (TFAM) and d (NFUFB8, SDHB, UQCRC2, MT-CO1 and ATP5A). Experiments were performed on islets isolated from eight-week-old male mice. Data were analysed independently

by unpaired Student's t-test (Control versus Obese). \* $p < 0.05$ . **(a)** control:  $n=6$ ; obese:  $n=5$  mice; **(b)** *mt-Nd5*, control:  $n=6$ , obese:  $n=6$ ; *Sdha*, control:  $n=7$  obese:  $n=8$ ; *mt-Cytb*, control:  $n=6$ , obese:  $n=6$ ; *mt-Co1*, control:  $n=6$  obese:  $n=6$ ; *Atp8*, control:  $n=6$ , obese:  $n=6$  mice; **(c)**  $n=5$  mice/group; **(d)** NDUFB8, control:  $n=5$ , obese:  $n=5$ ; SDHB, UQCRC2, MT-CO1 and ATP5A, control:  $n=7$ , obese:  $n=5$  mice. 'n' represents the number of mice from separate litters. All data are mean  $\pm$  s.e.m.



**ESM Fig. 4: Exposure to maternal obesity had no impact on the expression of pro-apoptotic Bax or anti-apoptotic Bcl-2.**

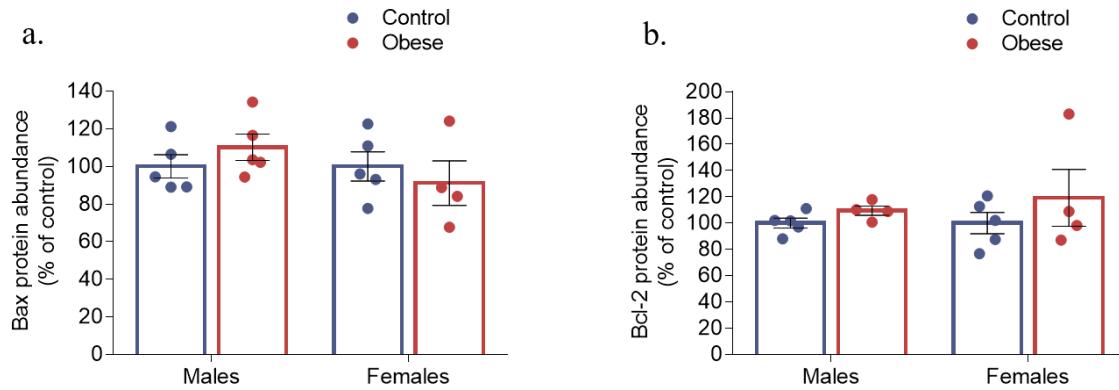

Western blot analysis of Bax (a) and Bcl-2 (b). Image of corresponding Western blots: ESM Fig.1i (BAX) and j (Bcl-2). Experiments were performed on islets isolated from eight-week-old offspring. Male and female offspring were analysed independently by unpaired Student's t-test (control versus obese). (a) males, control:  $n=5$ , obese:  $n=5$ ; females, control:  $n=5$ , obese:  $n=4$  mice; (b) males, control:  $n=5$ , obese:  $n=4$ ; females, control:  $n=5$ , obese:  $n=4$  mice. 'n' represents the number of mice from separate litters. All data are mean  $\pm$  s.e.m.
